# Supplementary material for: Flexible all-solid-state supercapacitors based on polyaniline orderly nanotubes array
Source: Royal Society of Chemistry journal article supplement (doi:10.1039/c6nr07921k), 2016-11-17
Supplement: c6nr07921k2.pdf [file c6nr07921k2.pdf]

## Supporting Information

### Flexible all-solid-state supercapacitors based on polyaniline orderly nanotubes array

Huihua Li, Juan Song, Linlin Wang, Xiaomiao Feng,\* Ruiqing Liu, Wenjin Zeng, Zhendong Huang, Yanwen Ma,\* and Lianhui Wang

Key Laboratory for Organic Electronics and Information Displays & Institute of Advanced Materials, National Jiangsu Synergetic Innovation Center for Advanced Materials (SICAM); Nanjing University of Posts & Telecommunications, 9 Wenyuan Road, Nanjing 210023, China

\* Corresponding authors.

E-mail addresses: iamxmffeng@njupt.edu.cn; iamywma@njupt.edu.cn

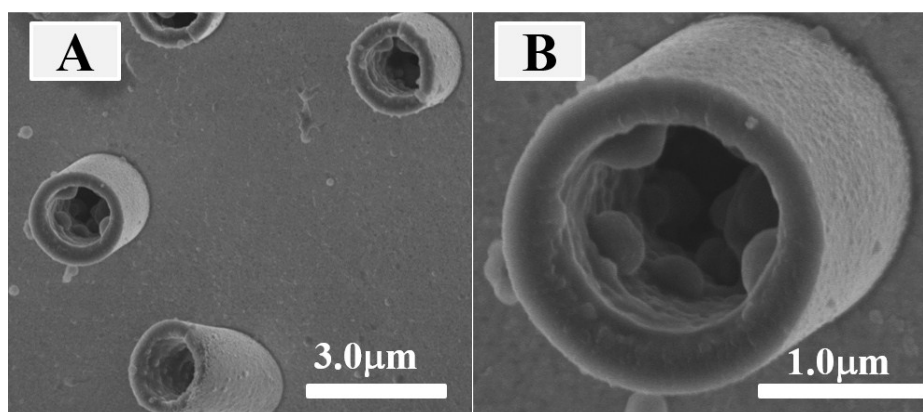

Fig.S1. SEM images of PANI/Au/PC-100 after 2000th cycles

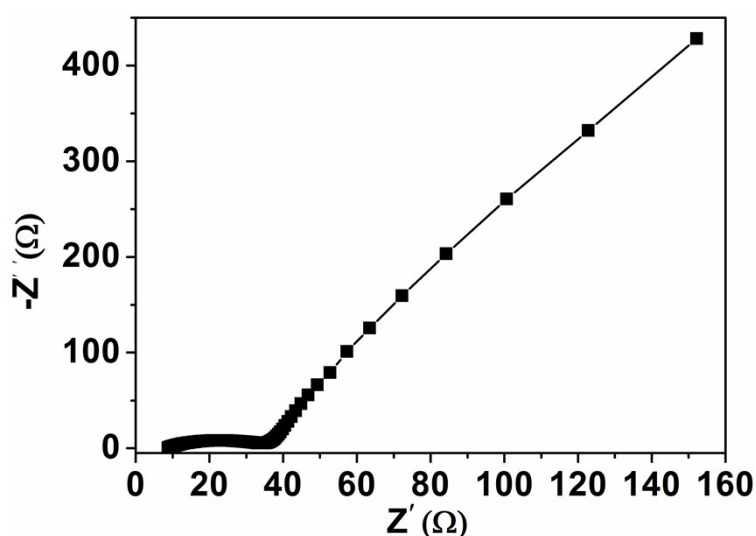

Fig.S2. Nyquist plot of PANI/Au/PC-100 after 2000th cycles
